# Supplementary material for: Subjective Perceived Effect of Mindfulness-Based Tai Chi Chuan versus Sleep Hygiene Education on Sleep Quality Improvement in Community-Dwelling Elderly People in Hong Kong: a qualitative study
Source: Research Square preprint supplement (doi:10.21203/rs.3.rs-6730548/v1), 2025-07-28
Supplement: Supplementary file 2 [file bc7c52bff38881e8207878fc.docx]

**Supplemental file 1: A semi-structured interview guide was used to facilitate the focus group discussions for both the MBTCC and SHE groups**

The guide covered three primary domains of inquiry:

For the Mindfulness-Based Tai Chi Chuan (MBTCC) group, participants were similarly asked about their overall experience after completing the program and whether they had observed any changes in sleep quality.

*1)* “How did you feel after completing the program? *Do you think the MBTCC course work in improving your sleep quality?*”Participants were first invited to share their overall impressions after completing the MBTCC programme. Interviewers explored whether they had experienced any improvements in sleep quality following the intervention.

2) “What do you think contributed to the improvements in your sleep?”
Participants were asked to reflect on the possible reasons for any perceived improvements in sleep. Interviewers explored whether participants had made any behavioural changes before and after the programme. They were also asked whether they had applied the mindfulness or Tai Chi Chuan techniques introduced during the sessions, such as continuing Tai Chi practice after the course. For those who had not, interviewers asked about barriers to practice, such as difficulties in remembering the movements or lack of motivation. For those who had applied the techniques, they were asked which components were perceived as effective.

*3) “Besides sleep, did the program help in other aspects of your daily life?”*

Participants were invited to answer whether the programme had brought about any benefits beyond sleep improvement. Interviewers explored whether participants experienced changes in emotional state, including levels of anxiety, unhappiness, or overall mood. Participants were also invited to explore whether they noticed improvements in their mental condition after completing the programme.

For the Sleep Hygiene Education (SHE) group, participants were first invited to share their overall experience after completing the program.

*1) “*How did you feel after completing the program? *Do you think the SHE course work in improving your sleep quality?*”
Participants were first invited to share their general impressions after completing the SHE programme. Interviewers explored whether participants perceived any changes in their sleep patterns. Where relevant, participants were encouraged to describe specific examples to illustrate these perceived changes.

*2) “*What do you think contributed to the improvements in your sleep?”
Participants were then invited the participant to reflect on the possible reasons behind their improved sleep. Interviewers explored whether they had made any behavioural changes in their sleep habits before and after participating in the programme. Participants were also asked whether they had applied the sleep hygiene techniques taught during the sessions. For those who had not, interviewers inquired about any obstacles that might have hindered their practice. For those who had applied the techniques, they were asked which specific strategies were found to be effective.

*3) “Besides sleep, did the program help in other aspects of your daily life?”*

Participants were asked whether the programme had brought any benefits beyond sleep-related outcomes. Interviewers explored whether there had been any changes in emotional state, including levels of anxiety, unhappiness, or overall mood. Participants were also invited to reflect on whether their mental condition had improved following the intervention.
